# Supplementary material
Source: PubMed Central journal article supplement (PMC3433395)
Supplement: NIHMS403650-supplement-Supplemental_Data.pdf [file NIHMS403650-supplement-Supplemental_Data.pdf]

Table. Summary of the 44 relevant findings among 350 enrolled patients (12.6%). 11 of these 44 findings were known prior to presentation in the emergency department (ED). Only 5 of the remaining 33 patients had direct ophthalmoscopy performed by the ED physician, and all these direct ophthalmoscopic examinations were recorded as normal.

| <b>Finding</b>                        | <b>Number</b> | <b>(%)</b>   |
|---------------------------------------|---------------|--------------|
| Intraocular hemorrhage                | 13            | (29.5)       |
| Optic nerve edema                     | 13            | (29.5)       |
| Grade III/IV hypertensive retinopathy | 10            | (23)         |
| Arterial vascular occlusion           | 4             | (9)          |
| Optic nerve pallor                    | 4             | (9)          |
| <b>Total</b>                          | <b>44</b>     | <b>(100)</b> |
